# Supplementary material for: Exploring the Mechanism of Resveratrol in Reducing the Soft Tissue Damage of Osteoarthritis Based on Network Pharmacology and Experimental Pharmacology
Source: Hindawi journal article supplement (doi:10.1155/2021/9931957), 2021-10-04
Supplement: f1 [file 9931957.f1.zip]

## Table S2 Resveratrol-OA Targets

BMP2  
STS  
ALB  
PDPK1  
MMP3  
PIK3CG  
MAPK14  
ADAM17  
ESR1  
GC  
MAPK10  
MAPK1  
CA2  
F2  
SRC  
DPP4  
PDE4B  
MMP8  
FGFR1  
PDE4D  
AR  
SULT2A1  
PGF  
HSD11B1  
PTPN11  
AKR1C1  
TTR  
GSK3B  
CDK2  
MMP13  
ESR2  
EGFR  
GSTP1  
MDM2  
PPARA  
SHBG  
KDR  
PTPN1  
TGFB1  
TRAPPC3  
NR1H3  
ELANE  
PGR  
CYP2C9  
HPGDS  
NR1H2  
MET

DHODH  
CCNA2  
JAK3  
F10  
ZAP70  
MMP2  
HDAC8  
SYK  
RBP4  
SERPINA1  
REN  
NR3C1  
PADI4  
HSP90AA1  
CTSS  
MMP12  
ITGAL  
S100A9  
PLA2G2A  
PPARG  
DPEP1  
NR1H4  
XIAP  
MAPKAPK2  
HMGCR  
F11  
IGF1  
IL2  
TEK  
MAP2K1  
THRA  
VDR  
KIT  
RARB  
CTSB  
CTSK  
PIK3R1  
TGFB2  
MMP9  
PPP1CC  
CASP1  
PROCR  
NFE2L2  
APP  
PTGS1  
PTGS2  
CA1  
TRPA1

CYP3A4  
PIK3CB  
RELA  
MIF  
AHR  
ALOX5  
ODC1  
MAPT  
CXCL12  
CYP1A1  
F3  
TYR  
MMP1  
KDM1A  
SIRT1  
CYP19A1  
ABCB1  
PTK2B  
ESRRA  
ESRRB  
IGF1R  
ALOX15  
LTB4R  
HDAC2  
VCP  
PLAT  
BCL2L1  
BCL2  
CALM1  
NOS1  
MTOR  
IGFBP3  
NOS2  
NOS3  
WEE1  
NOX4  
LMNA  
KCNMA1  
ARSA  
PRKN  
HDAC9  
CASP7  
CASP3  
HTT  
NFKB1  
NFKB2  
PTH1R  
NPC1

TP53  
HPGD  
HIF1A  
SMAD2  
SMAD3  
MEN1  
PAK1  
RGS4  
CYP2D6  
NR1H3  
NPR2  
GAA  
MYC  
TERT  
CD38  
CTSD  
SIRT2  
PRKCA  
DUSP1  
NFKBIA  
FPR2  
S1PR1  
BAP1  
CTSL  
ITGA4  
C1S  
ALPL  
CTSG  
HSPA8  
MMP14  
PTPN22  
RAC1  
NCOA3  
STAT3  
GNAI1  
STAT1  
PTGER2  
HSPA1A  
INS  
EIF2AK3  
RGS7  
TNFSF10  
CBFB  
JAK2  
NPSR1  
GLA  
MAP3K3  
PHOSPHO1

NOD2  
NOD1  
PKM  
KLF5  
CTNNB1  
OPRK1  
PLEC  
NLRP1  
GBA  
MITF  
BCL2L1  
GAPDH  
ALPI  
KCNQ1  
SENP6  
RXFP1  
NLRP3  
SLC2A3  
ABCC2  
FOXO3  
AKT1  
IDE  
FURIN  
MAP1LC3A  
MDM4  
ATM  
ADRB2  
EYA2  
TRPV1  
TRHR  
CCR6  
OPRD1  
OPRM1  
KEAP1  
PIN1  
PRKAR2B  
TLR9  
RAN  
SMPD1  
P4HB  
DNMT1  
CXCR6  
TLR3  
SUMO1  
TACC3  
ERG  
NSD2  
RIPK2

GNAS  
EPAS1  
TNFRSF10B  
MCOLN1  
PDE5A  
CYSLTR1  
MC5R  
MAPK3  
PPP3CA  
ERBB2  
PTPRC  
HTR2A  
ADORA2A  
ADRB1  
AGTR2  
BDKRB2  
CALCR  
SLC6A4  
TACR1  
FLT1  
VIPR1  
CNR1  
CCR2  
CCR4  
CCR5  
CXCR1  
CXCR2  
EDNRA  
HRH1  
HRH2  
EZH2  
UBE2M  
TNF  
CXCL8  
WRN  
COPS5  
TARDBP  
SNCA  
S100A4  
ERAP1  
PRMT1  
SELE  
UHRF1  
PLK1  
ADAM10  
PRNP  
FOXO1  
PLA2G3

HSPB1  
IL1B  
NRP2  
SIAE  
ATF6  
JUN  
GALC  
CGAS  
IFNG  
YAP1  
SIRPA  
CD47  
IFNB1  
HLA-B  
AICDA
