# Supplementary material for: Exploring the Mechanism of Resveratrol in Reducing the Soft Tissue Damage of Osteoarthritis Based on Network Pharmacology and Experimental Pharmacology
Source: Hindawi journal article supplement (doi:10.1155/2021/9931957), 2021-10-04
Supplement: f1 [file 9931957.f1.zip]

# Table S1 Resveratrol Potential Targets and OA genes

Resveratrol Potential Target set

BMP2  
STS  
ALB  
AKR1C2  
APOA2  
KIF11  
PDPK1  
MMP3  
PIK3CG  
NR3C2  
MAPK14  
PPP5C  
ADAM17  
ESR1  
GC  
MAPK10  
MAPK1  
CA2  
FNTA  
F2  
BCHE  
SRC  
CES1  
DPP4  
PIM1  
PDE4B  
DUSP6  
CTNNA1  
MMP8  
METAP2  
AKR1B1  
FGFR1  
CFD  
BACE1  
PDE4D  
AR  
MAOB  
SULT2A1  
PGF  
HSD11B1  
PTPN11  
RORA  
AKR1C1  
TTPA  
AKR1C3  
HSD17B1  
TTR

PPARD  
NQO1  
SEC14L2  
WAS  
GSK3B  
PCK1  
ADH5  
CDK2  
MMP13  
PRKACA  
ESR2  
EGFR  
ADH1C  
CHEK1  
GSTP1  
GSTA1  
MDM2  
PPARA  
SHBG  
THRB  
ADK  
KDR  
PTPN1  
TGFB1  
TRAPPC3  
NR1H3  
ELANE  
PGR  
CYP2C9  
SHMT1  
HPGDS  
NR1H2  
PDK2  
MET  
LCK  
DHODH  
DCK  
CCNA2  
JAK3  
F10  
PRKCQ  
ZAP70  
MTAP  
RXRA  
MMP2  
HDAC8  
SYK  
FKBP1A

RBP4  
FABP3  
FABP6  
ITK  
HNF4G  
SERPINA1  
ESRRG  
FABP7  
PYGL  
REN  
SULT2B1  
NR3C1  
LSS  
NR1I2  
PADI4  
SULT1E1  
GCK  
HSP90AA1  
AKT2  
CTSS  
AURKA  
MMP12  
ERBB4  
ITGAL  
S100A9  
PLA2G2A  
PPARG  
DPEP1  
NR1H4  
XIAP  
RARG  
MAPKAPK2  
HMGCR  
TGM3  
F11  
CRABP2  
CYP2C8  
FECH  
RARA  
BRAF  
IGF1  
MME  
HNMT  
IL2  
TEK  
MAP2K1  
ABL1  
THRA

VDR  
KIT  
RARB  
CTSB  
CTSK  
LTA4H  
ARG1  
HSP90AB1  
PIK3R1  
RXRB  
TGFB2  
ABO  
MMP9  
ADAM33  
BHMT  
INSR  
PPP1CC  
CASP1  
BIRC7  
TPSB2  
PCTP  
DTYMK  
PROCR  
PNMT  
FKBP3  
AMY1A  
AMY1B  
AMY1C  
NFE2L2  
APP  
CA3  
NQO2  
CA5B  
CA6  
CA5A  
CYP1B1  
PTGS1  
CA14  
CA7  
CA13  
CA4  
PTGS2  
MAOA  
CA12  
CA9  
CA1  
GFER  
TRPA1

CYP1A2  
CYP3A4  
PIK3CB  
SLC6A2  
CYP2C19  
PIK3CA  
TUBB1  
ALDH5A1  
ABAT  
RELA  
AKR1B10  
MIF  
AHR  
CISD1  
ALOX5  
ODC1  
GLO1  
MAPT  
G6PC  
CXCL12  
ABCG2  
CYP1A1  
F3  
TYR  
MMP1  
KDM1A  
KEAAP1  
ADNP  
SIRT1  
CYP19A1  
TUBB3  
ABCB1  
CLK1  
PTK2B  
ESRRA  
ESRRB  
IGF1R  
ALOX15  
HSD17B2  
DYRK1A  
DYRK1B  
LTB4R  
ERN1  
HSD17B14  
HDAC2  
ABCC1  
CBR1  
CYP11B1

CYP11B2  
CYP17A1  
CCNE1  
VCP  
PLAT  
CAPN1  
DRD2  
DUSP3  
BCL2L1  
BCL2  
RAF1  
CALM1  
NOS1  
TYMS  
MTOR  
IGFBP3  
NOS2  
NOS3  
ADCY5  
WEE1  
FLT3  
LIMK1  
NOX4  
YWHAG  
CDK5R1  
CDK5  
CBX1  
LMNA  
LRRC26  
KCNMA1  
KCNMB1  
KCNMB2  
KCNMB4  
MPHOSPH8  
ARSA  
PRKN  
HDAC9  
CASP7  
CASP3  
HTT  
RORC  
ATAD5  
NFKB1  
NFKB2  
RAB9A  
PTH1R  
ACHE  
GLS

TDP1  
NPC1  
TP53  
ATXN2  
SMN2  
GLI3  
HPGD  
HIF1A  
SMAD2  
SMAD3  
STK33  
MEN1  
KMT2A  
BRCA1  
POLK  
PAK1  
RGS4  
CYP2D6  
NR1I3  
ALOX15B  
RAPGEF4  
PPM1D  
NPR2  
ALDH1A1  
GCKR  
vif  
APOBEC3G  
FH  
BCR  
GLP1R  
GMNN  
IDH1  
GAA  
MBNL1  
PMP22  
POLB  
POLI  
BLM  
MYC  
TSHR  
TERT  
CD38  
CTSD  
SIRT2  
SIRT3  
PRKCA  
DUSP1  
S1PR3

CDC25B  
NFKBIA  
FPR1  
FPR2  
S1PR1  
BAP1  
CTSL  
NR5A1  
ITGA4  
C1S  
ALPL  
PTPN7  
HTR1A  
HTR1E  
CTSG  
HSPA8  
ROCK2  
NCOA1  
MMP14  
PTPN22  
F12  
RAC1  
NCOA3  
HRAS  
NPY2R  
EIF4G1  
PRKD1  
GALR2  
STAT3  
KLK5  
RGS12  
GNAI1  
STAT1  
HBB  
BCL2L10  
BCL2L2  
PTGER2  
BCL2A1  
MCL1  
NPY1R  
HSPA1A  
MPI  
DLD  
INS  
NCF1  
GNAO1  
RAD51  
RGS8



EIF2AK3  
RGS7  
RGS19  
RGS16  
TNFSF10  
RUNX1  
CBFB  
ALOX12  
SLC12A5  
MCOLN3  
JAK2  
NPSR1  
GLA  
KCNH2  
RBBP9  
S1PR4  
MAP3K3  
MAP4K2  
UBE2N  
PHOSPHO1  
NOD2  
NOD1  
PKM  
KLF5  
CTNNB1  
OPRK1  
PLEC  
NPBWR1  
GALK1  
GSTO1  
GPR55  
EIF4H  
UBA2  
SAE1  
UBE2I  
PABPC1  
GPR35  
CACNA1B  
NLRP1  
GBA  
PPME1  
LYPLA1  
TUBB  
PPP1CA  
MITF  
NR2E3  
PTBP1  
OXTR

BCL2L1  
GAPDH  
APLNR  
SENP8  
ALPI  
HHV8GK18\_gp81  
KCNQ1  
SENP6  
GSK3A  
RXFP1  
HDAC3  
AVPR1A  
PREPL  
NLRP3  
SLC2A3  
ABCC2  
FOXO3  
AKT1  
ALPG  
IDE  
SENP7  
HCRTR1  
CACNA1H  
SLC6A3  
PLA2G7  
USP2  
FURIN  
MAP1LC3A  
MDM4  
TSG101  
ATM  
L3MBTL1  
ADRB2  
FEN1  
EYA2  
GRK2  
SLC5A7  
TRPV1  
DRD1  
APAF1  
PAFAH1B2  
PAFAH2  
PAFAH1B3  
TNNT3  
TNNT2  
TNNT1  
APOBEC3A  
TRHR

PLIN1  
ABHD5  
PLIN5  
NTSR1  
CTDSP1  
CCR6  
HKDC1  
KAT2A  
OPRD1  
OPRM1  
BAZ2B  
DAGLB  
CFTR  
GOPC  
ATG4B  
KEAP1  
PIN1  
ARRB1  
HTR5A  
PRKAR2B  
PRKACB  
TLR9  
NR0B1  
CCT2  
USP1  
KPNB1  
SNUPN  
RAN  
SMPD1  
MC4R  
FXN  
P4HB  
DNMT1  
CRHR2  
CRHBP  
UCHL5  
PSMD14  
ABCB6  
POLH  
PTPN5  
MRGPRX1  
RIN1  
HOXA9  
CHRM1  
CXCR6  
FASN  
TLR3  
APOBEC3F

RAD54L  
NR5A2  
KCNK3  
SUMO1  
ARNT  
TACC3  
CHRM5  
CHRM4  
ID4  
LARGE1  
ERG  
NSD2  
RIPK2  
GNAS  
RACGAP1  
EPAS1  
TNFRSF10B  
ASAP1  
MCOLN1  
env  
TAAR1  
PDE5A  
PTAFR  
TBXAS1  
CYSLTR1  
MC3R  
MC5R  
CHRM2  
CHRM3  
MAPK3  
PPP3CA  
FYN  
ERBB2  
PTPRC  
HTR2A  
ADORA1  
ADORA2A  
ADORA3  
ADRA1D  
ADRA2A  
ADRA2B  
ADRA2C  
ADRB1  
ADRB3  
AGTR2  
BDKRB2  
CALCR  
HTR2B

HTR2C  
HTR6  
SLC6A4  
SIGMAR1  
TACR1  
TACR2  
FLT1  
VIPR1  
CNR1  
CCR2  
CCR4  
CCR5  
CXCR1  
CXCR2  
CCKAR  
CYP2A6  
CYP2E1  
DRD3  
DRD4  
EDNRA  
HRH1  
HRH2  
EZH2  
ACP1  
GPR183  
vpr  
FGF22  
RAD52  
NAE1  
UBE2M  
MLLT3  
PDIA6  
RBBP8  
GALR3  
SIX1  
TNF  
CXCL8  
WRN  
TRA  
MARVELD2  
NCOA2  
COPS5  
SMARCA2  
KLK7  
TARDBP  
PIP4K2A  
SNCA  
SIRT5

PAX8  
S100A4  
ERAP1  
PRMT1  
NR2F2  
MBD2  
SELE  
CASP6  
UHRF1  
PLK1  
ADAM10  
PRNP  
TDP2  
PLCB3  
PLCG1  
RAPGEF3  
FOXO1  
PLA2G3  
HSPB1  
PSIP1  
IL1B  
NRP2  
SLCO1B1  
SLCO1B3  
SIAE  
tat  
ATF6  
JUN  
PGD  
GALC  
CCDC88A  
KCNJ6  
CGAS  
IFNG  
YAP1  
PI4K2A  
GPR32  
NPR1  
SIRPA  
CD47  
FUS  
NTMT1  
ADCY9  
IFNB1  
HLA-B  
SGK1  
AICDA  
GPR151

OA gene set

COL2A1  
ACAN  
SMAD3  
FRZB  
COMP  
GDF5  
MATN3  
MMP13  
COL11A2  
ASPN  
CCAL1  
IL1B  
COL9A1  
PTGS2  
TNF  
IL6  
MMP3  
TNFRSF11B  
TGFB1  
MMP1  
ADAMTS5  
COL11A1  
FBN1  
IL1RN  
UFSP2  
OS4  
OS6  
TGFB1  
COL6A2  
COL1A1  
TGFB2  
ADAMTS4  
IL17A  
CILP  
SLC26A2  
IL1A  
LOC109461476  
CXCL8  
COL9A2  
BGLAP  
C4orf47  
TRPV4  
TRAPPC2  
TNFSF11  
TGFB3  
TIMP1  
MMP9

CRP  
BMP5  
AEBP1  
DDR2  
PTGS1  
SOX9  
COL9A3  
LRCH1  
IL10  
MGP  
MATN1  
CLCN7  
CHI3L1  
MCF2L  
ADAM10  
TNFAIP6  
KIF22  
HAPLN1  
PRG4  
ADAMTS14  
COL10A1  
CCN6  
UCMA  
COL5A1  
XYLT1  
UFC1  
COL5A2  
EBF3  
MED13L  
HOTAIR  
H19  
PACERR  
ANKH  
CANT1  
MEG3  
KCNK15-AS1  
COL1A2  
TMSB4X  
ESR1  
GAS5  
TGFB2  
MIR140  
VDR  
HFE  
COL3A1  
LEP  
LOXL3  
LOC102723692



HLA-B  
VEGFA  
PCGEM1  
PHEX  
MIR146A  
MEFV  
PMS2P2  
KCNJ5  
KCTD13  
IL1R1  
ADIPOQ  
MMP2  
TLR4  
IGF1  
EFEMP2  
IL18  
SMAD2  
CCL2  
ALB  
SPP1  
RUNX2  
DDH2  
F9  
CD36  
CASR  
PTPN22  
GHR  
BMP2  
LOC101448202  
IL4  
HGD  
FGFR3  
DCN  
MIR155  
SMAD6  
TNFRSF1A  
NOS2  
GNAS  
GBA  
PTHLH  
ACP5  
IRF5  
LRP5  
CALCA  
ACTA2  
MYH11  
CXCL12  
CCL5

MYLK  
FMOD  
ADAM12  
HMGB1  
IL13  
PPARG  
IFNG  
SLC2A10  
IBSP  
HPGD  
LOC101928222  
TIMP2  
F8  
TRPS1  
TLR2  
ATP7B  
HLA-DRB1  
BMP7  
CTSK  
AKR1C1  
ICAM1  
EXT1  
RELN  
CD44  
IL15  
SIRT1  
CCN2  
MMP8  
LMX1B  
SYK  
TNFRSF1B  
SOST  
PLAU  
FAS  
ENPP1  
PLOD1  
TCIRG1  
IL1RAPL2  
WWP2  
CENPP  
COG5  
HIF1A  
IL7  
TNFRSF11A  
ACE  
UFL1  
EXT2  
SCARB2

SERPINH1  
PTH  
VCAM1  
AP3D1  
BMP6  
ADAMTSL1  
SLC22A4  
IHH  
FGF2  
CCL3  
MAPK14  
FN1  
JUN  
SPARC  
LMNA  
RETN  
OTULIN  
PHEX-AS1  
PTCHD1-AS  
LOC100130744  
LOC106627981  
HLA-DQB1  
CSF1  
IL2  
CXCL1  
BTNL2  
OSM  
EFEMP1  
TYR  
CIITA  
KL  
ESR2  
TP53  
SOD1  
IGFBP3  
OPTC  
ADAMTS3  
NLRP3  
IL18R1  
AIP  
PLA2G4A  
MIR150  
FTO  
MAPK1  
FKBP14  
LOC113939944  
CCR6  
GNL3

MAPK8  
FOS  
DKK1  
COL6A4P1  
SOD2  
MEN1  
NAMPT  
SERPINE1  
IL17F  
CTSB  
SLC40A1  
ZMPSTE24  
KIF7  
GPR101  
ZNF687  
IL11  
CRH  
NOTCH1  
CALM1  
PTGES  
DOT1L  
LRP6  
GNA11  
PSAP  
PLAUR  
TLR5  
C1S  
TGM2  
GRIN2B  
SAA1  
OPRM1  
ALOX5  
TRPV1  
TLR8  
ELN  
IL4R  
LTBP1  
ADAM17  
THBS1  
POMC  
CPT2  
CD244  
COG4  
NFKBIL1  
MIR132  
SPDT  
BMP1  
F2RL1

BCL2  
CXCR4  
FGFR1  
ENG  
CTNNB1  
CASP3  
TLR8-AS1  
S100A12  
S100A9  
FASLG  
NFKB1  
UQCC1  
SP7  
IL23A  
TNC  
LEPR  
RHOB  
CCL20  
FSTL1  
HTRA1  
HSPA5  
CAT  
SERPINF1  
HLA-DQA2  
TGFA  
NGF  
RELA  
BMP4  
MMP14  
WNT1  
PTH1R  
CCR5  
ELANE  
PEPD  
MIR181A1  
MMP7  
NFKBIA  
DIO2  
MPO  
HP  
CCN4  
SOX5  
AGER  
ALDH1A2  
ADAMTS9  
MIR34A  
ACVRL1  
RET

BRCA2  
IDS  
LYZ  
ABCC9  
ARID1B  
LTBP2  
TMEM38B  
SLCO2A1  
CREB3L1  
FKBP10  
P3H1  
FUNDG2  
FKBP14-AS1  
LOC106050102  
HGF  
EPAS1  
COMT  
GLT8D1  
MIF  
LTA  
SUPT3H  
CX3CL1  
DSPP  
NCOA3  
MTHFR  
HSPD1  
TTR  
IL16  
FOXP3  
IGF2  
CSF2  
COX5A  
IL6R  
TIMP3  
BAX  
SERPINA3  
IL5  
BDNF  
UBA5  
UFM1  
CDK5RAP3  
DDRKG1  
UFSP1  
CASP1  
VIP  
FBLN2  
NLRP1  
DUS4L

FGF18  
HMOX1  
B2M  
GREM1  
PLA2G2A  
CTSL  
DMP1  
PON1  
PITX1  
NEAT1  
MRC1  
GPR22  
ANXA1  
ITGB1  
HLA-DQA1  
CP  
ADAMTS1  
LPAR1  
IL1RL2  
MIR149  
FGF23  
CXCR3  
NFE2L2  
PTN  
MIA2  
CXCL10  
IFRD1  
MMP17  
LEPQTL1  
GPT  
IL17RA  
IFNB1  
LOX  
NCOR2  
PARD3B  
CTSD  
PBRM1  
CDC5L  
S100A8  
IL32  
COL27A1  
LIF  
P4HB  
CANX  
MIR26A1  
MIR9-1  
VIM  
CCL18

STAT3  
BDKRB2  
CHADL  
IL2RA  
TRAF6  
EGF  
IL9  
HAS1  
FOXO3  
CLEC3B  
CCR2  
HRH2  
NME8  
VIM2P  
CASP8  
GSR  
CCL4  
MIR145  
TLR10  
DANCR  
TGIF1  
VCAN  
PARP1  
CXCL13  
SCN9A  
PAPSS2  
NOX4  
CYP27B1  
HDAC4  
MMP12  
TRAF1  
HSP90B1  
PIK3CG  
PADI4  
LRRK2  
IDUA  
APOA1  
CALCR  
SOCS1  
NR3C1  
PTK2B  
CCR1  
PROCR  
CSF1R  
CD40  
NPY  
FOXO1  
TLR9



SERPINA1  
HDAC9  
ERG  
FGF1  
MCAM  
TRAPPC2B  
HAS2  
POSTN  
IGFBP7  
MIR130A  
CD68  
FOSL1  
NOD2  
MEPE  
CCND1  
MIR29A  
MIR29B1  
GLIS3  
YAP1  
LGALS3  
IL37  
DNMT3A  
DEAF1  
PRKCA  
ITGB3  
KNG1  
CDH2  
ATF2  
GAPDH  
TNFSF13B  
GJA1  
CCR3  
IL1R2  
HAVCR2  
MAZ  
XIST  
FBLN1  
TNR  
TNFAIP3  
TLR3  
CXCR5  
TIMP4  
MIR335  
SELL  
STAT4  
ALPL  
LTBP3  
ASTN2

CTLA4  
WNT3A  
SST  
IGFBP5  
EDN1  
SP1  
CLU  
TACR1  
MALAT1  
PLOC2  
TPI1  
MTOR  
ANP32A  
MIR223  
CAMK2B  
TGFB3  
SLC39A8  
MUS81  
XRCC4  
CRTC1  
PLEC  
CSMD1  
SPCS1  
DNAH10  
NACA2  
RWDD2B  
TMEM167A  
SCARNA18  
TSBP1-AS1  
FLT1  
THBS3  
TFEB  
AGTR1  
GALNS  
SYVN1  
TRAPPC3  
TRAPPC4  
TRAPPC10  
TRAPPC9  
TRAPPC12  
TRAPPC6A  
TRAPPC2L  
TRAPPC1  
TRAPPC5  
TRAPPC8  
TECTB  
TRAPPC3L  
INHBA

LUM  
MMP28  
MIR210  
AR  
PLAT  
RBFOX1  
CILP2  
LGALS1  
OLR1  
CREB1  
DIO3  
CCR7  
SFRP4  
CDKN1A  
CYP19A1  
PTGER4  
CA2  
SIRT6  
LY96  
MC1R  
MIR671  
SLBP  
THRA  
USP33  
MIR98  
CXADR  
IL21  
UCN  
CXCL6  
MIR27A  
MIR4435-2  
SELE  
SLC17A5  
WNT16  
DCSTAMP  
TENT5A  
TRPV6  
XDH  
RARRES2  
PDIA4  
RAC1  
CXCL5  
MIR195  
ANGPT1  
MET  
ALOX15  
JUND  
WNT5A

ANXA5  
F5  
HLA-DPB1  
PRKAR2B  
BCAP29  
HPBP  
FGFR2  
SYNE3  
GNAS-AS1  
ADRB2  
OCRL  
TSPO  
SOX6  
PREP  
FOLR2  
ZFAS1  
IL1RAP  
IL1RL1  
MIR15A  
IL34  
MIR21  
PADI2  
SLC11A1  
SNRPB  
CD86  
TECTA  
CEACAM16  
OTOG  
TH  
PECAM1  
IGF1R  
ANPEP  
CD14  
SERPINC1  
GHRL  
SAA4  
OPRD1  
CXCR1  
LCN2  
IL18RAP  
AQP1  
SRC  
HLA-A  
GLB1  
SIRT2  
CHST11  
SHOX  
MYC

PRDX5  
ITGB5  
EDEM2  
LINC00976  
MMP10  
SLC34A1  
TWIST1  
FAP  
STC1  
OLIG3  
MIR9-3  
MIR9-2  
CAV1  
AKT1  
CXCR2  
MAP2K4  
ITGB2  
CDKN2B-AS1  
PNOC  
CD40LG  
MITF  
CHI3L2  
ADIPOR1  
PDPN  
PIK3R1  
CD247  
ADCYAP1  
TREH  
AKNA  
PART1  
MIR381  
IL22  
JAG1  
F3  
IL33  
BMPR1A  
SMO  
BSG  
TNFSF13  
ACTG1  
NR1D1  
HDAC7  
TYMP  
CALM2  
CRYAB  
NTN1  
CCL11  
SERPINB2

SREBF2  
CRLF1  
ITLN1  
FFAR4  
UNC5B  
SPON1  
MIR141  
MIR16-1  
MIR204  
MIR26B  
MIR22  
MIR27B  
MIR33B  
MIR488  
FOXD2-AS1  
ADAMTS8  
SNORD19  
CXCL2  
ENO1  
P4HA2  
DPP4  
PGF  
CCL21  
ROR2  
GUSB  
IL24  
SLPI  
CEMIP  
MIR193B  
MIR365A  
GPI  
OLAH  
ADAMTS15  
HMMR  
NUCB2  
BIRC5  
GZMA  
TCF7L1  
F2  
GHRHR  
FLNA  
GPT2  
SLC26A4  
FBN2  
ANKAR  
H2AC18  
NEMP2  
PDCD5

CX3CR1  
TFRC  
CRYAA  
FAM20C  
ALMS1  
SLC34A3  
GBP4  
SMAP2  
PALM  
PALMD  
PTEN  
ITGAM  
IL10RA  
B3GAT3  
IL3  
ADIPOR2  
CCL8  
CLEC4A  
CYTL1  
MIR320A  
TPSAB1  
MIRLET7E  
MIR454  
MIR885  
BGN  
ALPP  
FKBP5  
UGDH  
TNXB  
HPSE  
IGFBP2  
CARD16  
CCN1  
MIR221  
PRELP  
CHAD  
CTSG  
MYD88  
CSGALNACT1  
APLN  
PRTN3  
CSK  
ATP6V0A2  
TBX4  
PLEKHM1  
USP50  
GSK3B  
SPHK1

CNR1  
CD38  
HBEGF  
SP3  
KLF2  
SOD3  
PCSK6  
LGALS9  
MIR199A1  
MIR199A2  
MIR675  
CD163  
PRL  
ITGAL  
SDC1  
SMURF2  
MIR320C1  
NOS1  
CHRD2  
PAK1  
TUG1  
NLRP12  
HRH4  
SEMA3A  
RPA3  
CXCL11  
HBP1  
IL36A  
MIR125B2  
MIR125B1  
LOC111365141  
NOG  
IL23R  
DUSP1  
NGFR  
S100B  
MMP16  
ARNTL  
CCL22  
MIR455  
SDC4  
LNCRNA-ATB  
CYCS  
SELP  
TEK  
GGT1  
KDM1A  
CD80



STEAP4  
TNFRSF10A  
JAM3  
STAT1  
CFI  
CSF3  
MAP2K6  
ATF3  
MIR30C1  
C3  
GRN  
DDR1  
PPARGC1A  
CAST  
MAF  
HMGA2  
B4GALT1  
CST3  
GPD1L  
CD47  
AHSG  
HYAL2  
SFRP1  
LGALS8  
CABIN1  
HMGB2  
MRC2  
ADAMTS7  
CIRBP  
MIR582  
MIR590  
MSH6  
TMPO  
CNR2  
BAG6  
ATF6  
KCNJ11  
HMGCR  
XBP1  
GLRX  
MUTYH  
ORAI1  
UTS2  
COL6A4P2  
GPR33  
IL18BP  
THBD  
RECK

NT5E  
VEGFC  
ALK  
CDKN2A  
NOS3  
ETS1  
LEF1  
MAP3K5  
CYBA  
OPRK1  
SHC1  
CCR4  
KDM6B  
PTGES3  
PPBP  
SERPINB5  
SERPINE2  
TFF3  
SERPINA4  
PITRM1  
IL27  
CCL13  
IFNL1  
MIR181A2  
MIR30A  
MIR206  
MIR139  
MIR101-1  
ERVK-18  
POR  
PTGER2  
CYP1A1  
TCF4  
ADM  
NCALD  
HHIP  
NRCAM  
SIK3  
LRG1  
MIR4435-2HG  
MELTF-AS1  
NOD1  
AQP9  
MAP1LC3A  
ETS2  
STAB1  
SCUBE1  
IGFBP1

PRKN  
PDCD1  
PPARA  
KIR2DS4  
INS  
DSP  
CSTA  
TGIF2  
FOXD1  
TLR1  
FAH  
HPD  
PSTPIP1  
FMR1  
CHST14  
HPS6  
MRAP  
SAA2  
AHR  
YY1  
GALE  
HABP2  
KLRB1  
HIF3A  
FIP1L1  
PRNCR1  
IL2RB  
ADA  
PLA2G3  
EZH2  
NR1H3  
XYLT2  
IL12A  
C5AR1  
GSTM1  
SLC23A2  
BBC3  
FGF21  
SCG2  
GSTT1  
MIR29B2  
MIR29C  
MIR483  
MIR338  
NKILA  
CALR  
HSD11B1  
LRP1

SMAD4  
APOH  
L3MBTL2  
L13304-024  
AB372731  
HSALNG0135621  
TNFRSF6B  
TMED2  
ATM  
BMPR2  
CSF2RA  
CTSS  
BRD4  
KPNA2  
CS  
MSTN  
ULK1  
PTH2R  
SFTPB  
SFTPC  
SFTPD  
DNTT  
SFTPA1  
CMKLR1  
MFAP4  
SLC25A27  
MIR23A  
HOTAIRM1  
MIR186  
MIR940  
MIR300  
OAP  
LOC106728418  
CHIT1  
TNIP1  
THY1  
PYCARD  
IL19  
IL22RA1  
EP300  
KAT5  
ITIH1  
ILF3  
CEACAM4  
CHUK  
CCK  
TREM1  
CXCL9

ADAM15  
SMPD1  
PPP3CA  
GSTP1  
ESRRB  
EDNRA  
PIK3CB  
PDPK1  
CYP2D6  
TP63  
KEAP1  
ENO2  
FAAH  
CD3D  
CSNK1E  
TRAF3  
SOX2  
PRKAA1  
C5  
HCFC1  
HYAL1  
BECN1  
DVL2  
NCAM1  
TARDBP  
RIPK2  
DLL1  
APOB  
PKM  
SHMT2  
MECP2  
FOXO1  
BCL2L1  
KLF5  
MFGE8  
GANAB  
HLA-G  
NFATC4  
ACSL4  
BRD2  
RBP4  
WIF1  
TRAF2  
TFF1  
SPHK2  
SULT2A1  
PDE5A  
PFKFB3

PDE4A  
NR1I3  
PTPRD  
COL6A3  
LOXL2  
HES1  
GPX3  
LGR5  
CSPG4  
DDIT4  
PTGES2  
TRIM24  
ZFP36L1  
TAGLN  
STT3B  
PRDX4  
PDGFC  
RSPO2  
RIPK4  
APOL1  
KHDRBS1  
CBX4  
BAG1  
EIF4G2  
VPS4B  
RIPK3  
SECISBP2  
LPA  
DGCR8  
CHKA  
CCL7  
UBE2M  
SOX11  
SMN1  
NOX1  
FUT1  
DPP7  
IL17RC  
HS6ST2  
HGFAC  
CPEB1  
DKK3  
ABCD2  
UNC5C  
TFF2  
SDCBP  
KLK11  
CD160

DSTN  
BOK  
TSC22D3  
TUFT1  
OXA1L  
UHRF1  
LGR4  
FOXP4  
CREB3  
BCL2L13  
EN1  
FIS1  
DUSP19  
SUB1  
CCL16  
CRTAC1  
RACK1  
NID2  
FUT4  
LAG3  
CCAR2  
CKLF  
NKX3-2  
YAF2  
CORT  
CCL14  
CCL15  
TRIM59  
ATG2B  
HSH2D  
GRINA  
MICAL3  
FNDC5  
TM2D3  
SHROOM1  
XCL2  
TUT7  
KCNQ1OT1  
CASC2  
PVT1  
MIR196A2  
MIR138-2  
MIR152  
MIR200B  
MIR30B  
MIR370  
MIR373  
MIR181C

MIR449A  
SNHG1  
MIR93  
MIR128-1  
MIR138-1  
MIR375  
MIR107  
MIR23B  
MIR301A  
MIR211  
MIR24-1  
SNHG15  
SNHG5  
MIR124-3  
MIR16-2  
MIR193A  
MIR451A  
MIR129-1  
MIR129-2  
MIR324  
MIR337  
MIR106A  
MIR24-2  
MIR377  
SNHG16  
LOXL1-AS1  
MIR361  
MIR486-1  
MIR577  
MIR411  
SNHG14  
MIR1236  
MIR105-1  
MIR1277  
LINC00662  
MIR634  
MIR1202  
MIR1246  
TP53COR1  
LOC112543491  
LOC110283621  
JAK2  
APP  
LPL  
XIAP  
C1R  
ADAMTS2  
CEACAM8



FCGR2B  
HTR2A  
MAP3K8  
CR1  
FGF7  
SRF  
LECT2  
CEBPB  
TNFSF14  
HDAC1  
CFLAR  
CD28  
IL6ST  
MAPK10  
HDAC2  
PTPRC  
RAG1  
GAL  
SNAI1  
GNS  
ALCAM  
RAG2  
SHBG  
ATP6V0E2  
SULF1  
FGFR4  
VWF  
PRODH  
NPC1  
ERCC6  
GALC  
FMO1  
GH1  
PIGB  
PDZD11  
MAPT  
USP8  
TRIM32  
ABT1  
SLC2A1  
TSLP  
MATN4  
MAP2K7  
MYDGF  
WNT7A  
LDHB  
SETD2  
TNKS

SETD1A  
P4HA1  
CA10  
HES5  
MIR146B  
BHD  
ITGAV  
MBL2  
FCGR3A  
GDF6  
SIGLEC1  
PRRC2A  
EGR1  
PDGFRA  
PRKG1  
ACTB  
MAT2A  
NR4A2  
TYRP1  
SLC26A3  
REL  
FBLN5  
SLC26A5  
MFAP5  
SLC26A8  
CCRL2  
LTBP4  
SLC26A1  
SLC26A6  
SLC26A11  
FCRL3  
CAPN14  
GGT2  
MACIR  
GGTLC3  
TMPO-AS1  
TGFB2-AS1  
TGFB2-OT1  
ENSG00000259039  
JUNB  
IKBKE  
STAT5B  
LBR  
FGA  
AMPD2  
FGF3  
CD34  
GGT3P

SOCS3  
LRP2  
S100A4  
CD151  
NTRK1  
ALOX5AP  
CD79A  
BST1  
FCGR3B  
PCSK9  
NF1  
CYP11A1  
NPM1  
GPD2  
SLC25A13  
AP3B1  
GAK  
HERC2  
ATP2B1  
ADD1  
CDC7  
PAX7  
SOCS2  
GRK4  
HTT  
HK3  
CRADD  
EIF2B1  
MMP24  
USP24  
TACC3  
SLC39A4  
ITIH4  
LCT  
NFAT5  
EEF1D  
CRBN  
ANXA3  
DPEP1  
PUF60  
SPTBN2  
PTPRG  
SLC30A10  
SCYL1  
MCAT  
RASGRP3  
SMYD3  
JPH3

CYP2A13  
SCRIB  
AGAP1  
MAGI1  
MAT2B  
HLA-DPA1  
DYNC1I1  
CEACAM3  
ABCB9  
EIF6  
RNF4  
STRA6  
POLA2  
PRDM2  
SART1  
SHARPIN  
SLC44A2  
PAPPA  
SH3BP2  
NISCH  
NEK4  
CPNE1  
GALNT5  
MAF1  
FAR2  
GGT7  
GBX2  
CPSF6  
AAGAB  
B9D2  
BMP2K  
BTN3A1  
CEP250  
NCAM2  
RNASEH2C  
RFX3  
UNC5A  
YKT6  
TIPIN  
SMG6  
PLXNC1  
SF3B2  
RAD54L2  
ZMYND8  
KCNIP4  
MAEA  
KANSL1  
ACER3

TCTN2  
SF1  
RPL29  
RPGRIP1L  
NCOA6  
FOXL1  
DDX10  
IRX3  
LRIG3  
EXOSC4  
EYA2  
CDK2AP1  
DLGAP2  
BTN2A1  
ANKRD6  
CHD9  
NDST4  
SNX32  
MRPL11  
SENP6  
PARP10  
RFT1  
HNRNPUL1  
RBM39  
TNIP2  
FRMD4A  
COLGALT2  
ISLR  
LRRN1  
LYPLAL1  
NELFA  
FAM136A  
ERGIC3  
ABHD14B  
BTN2A2  
TAS1R2  
RBM6  
VPS51  
TTI1  
POGK  
RPRD2  
PPM1H  
RAPH1  
RBM12  
TNFSF8  
APOBEC4  
FSTL5  
ISLR2

H1-4  
KIF12  
KIAA1217  
KIF26B  
LMAN1L  
DDX55  
DHX35  
ERP27  
BTN3A2  
ATF7IP  
ANAPC4  
AAR2  
CCDC33  
TMEM91  
TTLL12  
MOB3B  
SBNO1  
NSD2  
RP1L1  
SF3A2  
MPHOSPH9  
ZCCHC8  
C11orf80  
ACTR5  
CCDC91  
RALGAPB  
ZWILCH  
UVSSA  
ZFYVE28  
SRBD1  
NT5DC2  
FILIP1  
BTN3A3  
GSDMC  
HAUS3  
GALNT18  
H4-16  
HECW1  
EPPK1  
NRBP2  
TSKU  
ZFPL1  
TENM2  
RRP9  
KNTC1  
KLHL42  
ZC3H3  
IQCH

H1-2  
IZUMO4  
HMGN4  
NKAIN1  
BRINP1  
BTNL8  
EIF1AD  
TSPAN17  
SPATC1  
THSD7B  
MLXIP  
RSRC2  
KAZN  
CCDC97  
CEACAM21  
ZBED5  
POLR2M  
H3C3  
LURAP1L  
LRRC37A  
FAM53A  
FAM83C  
FAM193A  
FAM98A  
C12orf60  
KIAA1755  
H1-3  
H2BC4  
H2BC9  
LSMEM1  
CLEC18A  
TMEM129  
TMEM241  
EQTN  
CNBD2  
CLEC18C  
ZNRD2  
PLPP6  
C11orf87  
H2AC6  
ATP23  
ZNF345  
TMEM61  
C8orf82  
ATP6AP1L  
C16orf95  
CCDC26  
SMIM4

MS4A13  
PCNX3  
MANSC4  
RFLNA  
STIMATE  
MINAR1  
DELEC1  
BTN2A3P  
SMIM23  
LINC01006  
DNAH10OS  
LINC00114  
MIR661  
SNHG17  
GDF5-AS1  
HCG11  
PDXDC2P  
GUSBP2  
CTBP1-DT  
NOP14-AS1  
LINC01088  
LINC02210  
LINC00977  
SNORD16  
SAMMSO  
IQCH-AS1  
MIR4286  
HCG23  
FAM83C-AS1  
NR2F2-AS1  
SNORD19B  
ILF3-DT  
LINC01094  
LINC02210-CRHR1  
LRRC37A4P  
LOC100129917  
LINC01507  
ZC3H11B  
ASTN2-AS1  
MIR1289-1  
GARS1-DT  
ATP2B1-AS1  
DUBR  
LOC102546299  
MMP24OS  
LOC157273  
LOC349160  
LYPLAL1-AS1



NSFP1  
MDFIC2  
LINC01574  
DDX19A-DT  
DUS4L-BCAP29  
ENSG00000255224  
LOC728975  
ROCR  
LSP1P3  
HOMER3-AS1  
LINC02399  
KIF26B-AS1  
LOC101928731  
LOC101929054  
TMED2-DT  
ZNF664-RFLNA  
SBNO1-AS1  
LINC01754  
LINC01338  
LINC02234  
LOC101928540  
ENSG00000254632  
ENSG00000272462  
ENSG00000253926  
ENSG00000255730  
ENSG00000261324  
ENSG00000261384  
ENSG00000254855  
ENSG00000254461  
ENSG00000255038  
ENSG00000255320  
ENSG00000237174  
ENSG00000206249  
LOC729254  
SLBP-DT  
RPL35AP  
ENSG00000245156  
LINC02742  
LINC02650  
MAPK8IP1P1  
MAPK8IP1P2  
MTND4P14  
RNA5SP301  
ENSG00000252443  
ENSG00000254094  
ENSG00000261578  
ENSG00000249664  
ENSG00000258216

ENSG00000260233  
ENSG00000231612  
ENSG00000234091  
ENSG00000228322  
ENSG00000227554  
NPM1P14  
RN7SKP173  
LINC02752  
H2AC5P  
LINC02680  
RNA5SP349  
RNA5SP355  
ENSG00000257042  
ENSG00000275443  
ENSG00000282246  
ENSG00000250098  
ENSG00000260773  
ENSG00000250453  
ENSG00000234892  
ENSG00000223727  
ENSG00000200998  
ENSG00000237530  
ENSG00000238224  
LOC102724929  
SOD2P1  
TPT1P9  
MPPED2-AS1  
PPIAP1  
RPL26P20  
ENSG00000248112  
CNN2P10  
LOC101928268  
ENSG00000272588  
ENSG00000273771  
ENSG00000274874  
ENSG00000285108  
ENSG00000251446  
ENSG00000279093  
ENSG00000285668  
ENSG00000287373  
ENSG00000273179  
ENSG00000238232  
ENSG00000173727  
ENSG00000207009  
ENSG00000238156  
NPIP14P  
NPAP1P4  
RPL21P34

MRPS33P3  
HSALNG0046573  
lnc-GLIS3-2  
lnc-KCNK7-4  
lnc-SSSCA1-1  
lnc-IQCH-7  
MARK2P15  
LOC105369212  
ENSG00000283517  
ENSG00000285914  
ENSG00000286910  
ENSG00000285577  
ENSG00000280904  
ENSG00000285144  
ENSG00000277749  
ENSG00000219682  
lnc-GGCT-3  
lnc-PLEC-4  
HSALNG0026167  
HSALNG0032399  
HSALNG0032401  
ENSG00000239793  
ENSG00000287632  
ENSG00000288096  
ENSG00000288639  
lnc-ZMYND8-10  
HSALNG0005615  
FJ601676  
HSALNG0048733  
HSALNG0035397  
HSALNG0026174  
NONHSAG001562.2  
piR-40096  
piR-43098  
HSALNG0069708  
HSALNG0069709  
HSALNG0069710  
HSALNG0123133  
lnc-ADD1-6  
lnc-APOBEC4-5  
NONHSAG011935.2  
lnc-FAM83C-3  
lnc-PRPF18-2  
lnc-SOCS2-6  
lnc-STAB1-1  
lnc-TIMM29-1  
lnc-CTDSP2-7  
lnc-FAM83C-2

lnc-TTLL12-1  
lnc-YKT6-2  
MK280269-012  
piR-31751  
piR-34822-068  
RF00017-6801  
RF00017-6803  
SNODB718  
HSALNG0094715  
L13304-005  
lnc-ADD2-2  
lnc-KIF12-2  
lnc-KIF12-3  
piR-39858-250  
piR-50208  
piR-50446  
RF00017-2167  
RF00017-2535  
RF00017-4662  
H3P27  
ENSG00000256378  
ENSG00000280309  
ENSG00000277135  
ENSG00000286417  
LOC107986989  
lnc-NT5DC2-1  
lnc-PBRM1-2  
lnc-TACC3-3  
HSALNG0046567-001  
HSALNG0059706  
SMC4P1  
RPL14P6  
5MWI\_A-023  
HSALNG0023242  
HSALNG0059707  
HSALNG0032308  
HSALNG0026168  
HSALNG0026169  
HSALNG0026175  
HSALNG0026176  
HSALNG0050296  
HSALNG0092966  
HSALNG0123135  
HSALNG0126180  
HSALNG0126183  
HSALNG0092958-001  
HSALNG0111532  
HSALNG0130549-001

HSALNG0130549-002  
lnc-ADAM10-10  
piR-36756-038  
piR-43107-151  
RF00017-2855  
HSALNG0123949  
MN308750  
HSALNG0073879  
HSALNG0093138  
HSALNG0094803  
HSALNG0106203  
HSALNG0127649  
HSALNG0129967  
lnc-HFM1-3  
lnc-KLHL42-2  
lnc-NEK4-1  
LOC101929770  
ENSG00000274075  
ENSG00000286953  
ENSG00000279304  
ENSG00000280022  
ENSG00000286018  
ENSG00000278892  
HSALNG0010676  
HSALNG0010680-001  
HSALNG0012153-001  
LOC105369890  
LOC105376839  
LOC107986000  
lnc-COLGALT2-6  
lnc-FGF18-4  
HSALNG0057639  
HSALNG0015811  
HSALNG0063314  
MF281437-018  
ENSG00000244712  
HSALNG0012153-002  
HSALNG0046568  
HSALNG0032304  
HSALNG0032306  
HSALNG0033405  
HSALNG0043117  
HSALNG0043118  
HSALNG0046882  
HSALNG0050314  
HSALNG0117900  
HSALNG0117901  
NONHSAG012622.2

HSALNG0073878  
HSALNG0112393  
HSALNG0113623  
HSALNG0124661  
piR-49204-003  
lnc-LINC02210-CRHR1-1  
piR-56497-029  
piR-57133-366  
piR-61945-087  
RF00004-010  
RF00017-1212  
RF00017-4614  
RF00100-018  
HSALNG0085882  
lnc-ARHGDIB-2  
lnc-LYPLAL1-11  
lnc-TMEM167A-7  
lnc-TNC-7  
piR-46368  
RF00994-385  
HSALNG0076293  
HSALNG0090065  
HSALNG0107171  
HSALNG0133078  
piR-30534  
piR-32023-046  
piR-52471-007  
piR-60429  
RF00001-070  
LOC105377721  
LOC107986600  
LOC107985895  
HSALNG0043116  
HSALNG0046883-002  
HSALNG0116887  
piR-56497-036  
RF00017-2174  
HSALNG0116918  
piR-49732-244  
piR-57133-262  
KDR  
EPHB4  
PRKCZ  
CAPN2  
NRP1  
ANG  
GC  
CYP2C9

WRN  
IKBKB  
TNFRSF10B  
S100A11  
ANGPTL2  
BMP3  
PRKAR1A  
ACVR1  
CDH1  
PSMB8  
SNCA  
GLA  
ZEB1  
IKZF1  
F7  
CYP24A1  
CDKN1B  
ZEB2  
PINK1  
ASAH1  
ARSA  
PARK7  
GALNT3  
PLOD3  
COL4A3  
LAMP2  
COL4A4  
M6PR  
ATP13A2  
LOXL1  
UGCG  
SLC39A13  
PECR  
GSTM5  
NPC2  
GBA2  
COLEC12  
BLZF1  
ICOSLG  
LZTS1  
COL15A1  
SYNJ2BP  
PLEKHA7  
STARD10  
PCMTD1  
EMP1  
COL6A5  
EMSY

PHYHD1  
MIR10B  
MIR222  
MIR212  
MIR103A1  
MIR664A  
MIR6069  
ATG7  
MIR136  
KLF3-AS1  
MAP3K7  
ITGA4  
CD55  
ICAM3  
ELF3  
DEFB4A  
MIR92A1  
CXCL16  
EFNB2  
TNFSF12  
DEFB103B  
PF4  
ARL13B  
FCGR2A  
HLA-DRB5  
LTB  
FLG  
GPBAR1  
BTLA  
CPOX  
ANXA6  
ZFP36  
MAP2K3  
ANXA2  
TNFSF10  
MAP3K2  
VTN  
SMAD7  
AIF1  
F2R  
TAC1  
HNF4A  
IRAK3  
LMNB1  
CPB2  
COL4A5  
ESD  
SERPINF2



CHIA  
DSE  
NPPC  
LAMP3  
DNMT1  
FST  
FURIN  
HSD11B2  
AMBP  
E2F2  
GADD45B  
OSCAR  
POLG  
LTF  
TIA1  
ELAVL1  
HOMER1  
CD58  
IL20  
ZBTB38  
MIR203A  
FAM215A  
MIR448  
FZD1  
ERBB2  
PDGFB  
PGK1  
CA1  
CD59  
DDIT3  
CFP  
PLA2G5  
LGALS3BP  
POMGNT2  
PROC  
HDC  
ITGA1  
SMAD5  
PTX3  
HAS3  
SOX4  
TNFRSF13C  
LAIR1  
RNASE3  
GRIN2D  
GNAQ  
RIPK1  
GK

HLA-DRA  
GNAI3  
SLC6A4  
SH2D1A  
HTR3A  
ATIC  
SLC19A1  
PAX9  
PPP1CB  
LFNG  
DHODH  
SLC9A3R1  
RELB  
PPP1CC  
SERPIND1  
HTR3B  
MCOLN1  
CACNA1F  
STS  
MAFB  
CLCN5  
CLCN4  
PAX1  
ROBO3  
GPR143  
CHST3  
MEOX1  
SUCLG2  
OCA2  
RPS26  
MICB  
HLA-DMB  
BAZ1B  
CD69  
HLA-DOA  
HLA-DMA  
CARD8  
GDF3  
GNPTAB  
ZBTB20  
SLC24A5  
NPSR1  
COPE  
GPRC6A  
HPS4  
HPS5  
GNPTG  
DDX39B

TBX6  
SLC35D1  
SLC45A2  
MLANA  
FRMD7  
MICA  
MYO18B  
CABP4  
TBL1X  
TAGAP  
RIPPLY2  
PACSIN3  
COG1  
HES7  
CLEC16A  
SUPT20H  
TGDS  
PLB1  
SIAE  
ZNF334  
MESP2  
YIPF3  
ZNF664  
LACC1  
SHROOM2  
LRMDA  
TMSB15A  
RIPPLY1  
KCNJ18  
UCA1  
SNHG29  
FBXL19-AS1  
SNHG28  
AP4B1-AS1  
LURAP1L-AS1  
MIR4497  
MYO18B-AS1  
GPR143P  
OASD  
OA3  
TERT  
ZAP70  
BMPR1B  
MAPK3  
GSN  
MAPK9  
TAB2  
RHOA

FPR2  
IL7R  
IRF1  
FHL2  
SLC9A3  
ANGPT2  
CHRNA7  
TRPA1  
LTB4R  
ICAM2  
TICAM1  
S1PR1  
P2RX1  
TRIB3  
NRP2  
SIRPA  
TNFRSF17  
CD209  
LTB4R2  
IGFBP4  
CHGA  
FCGR1A  
LTBR  
IL17B  
BPI  
ACKR3  
CAMP  
CCL19  
SEMA3F  
KIR3DL1  
CTHRC1  
KCNIP3  
KIR2DL4  
ADGRE5  
KIR3DL2  
ADGRE2  
XCL1  
SPA17  
GALNT15  
KIR2DL1  
KIR2DL3  
KIR3DL3  
VASH1  
ZC3H12A  
PCOLCE2  
SNX19  
LVRN  
FNDC1

SAAL1  
KIR2DL2  
KIR2DS2  
KIR2DS3  
KIR2DL5A  
KIR2DS1  
KIR3DS1  
MIR17  
MIR127  
MIR31  
MIR33A  
MIR148A  
KIR2DP1  
HDAC8  
TXN  
RAMP2  
CXCR6  
ADAMTS12  
MIR95  
NFKB2  
APOE  
GRM1  
DBH  
ROCK1  
KCNQ1  
F10  
CD4  
PRKDC  
PDE3A  
MVK  
PBX1  
PIIB  
ADRB1  
COL4A1  
ASS1  
CBS  
PAH  
PDE4D  
ADSL  
GAA  
IKBKG  
LIPA  
NFATC1  
GHSR  
AK1  
ABCC2  
TAP1  
WNT10B

SSTR2  
PKLR  
PDE6A  
PRLR  
SLC11A2  
NPR2  
MSX2  
CD8A  
ILK  
LAMA1  
GJB2  
ERCC1  
ATP7A  
ACTN4  
XPA  
MTR  
TRPM6  
TK1  
PRNP  
PDP1  
PAX2  
RFC1  
PRPS1  
PSMB9  
HEXA  
FDPS  
ERCC4  
EYA1  
F11  
PKD1  
MSX1  
ARRB2  
ADH4  
FRK  
IGFALS  
CBX5  
GFM1  
ATP6V1B1  
AGL  
CKM  
EMD  
TAP2  
TAT  
TFR2  
STEAP3  
SGSH  
NPHS1  
RPE65

RAN  
SEC24D  
TP53BP1  
ARSB  
CD2AP  
CCS  
HAMP  
IRF6  
MBTPS2  
LPAR3  
LMNB2  
ERAP1  
CLCNKB  
ANK3  
ADH1B  
TAPBP  
TLR6  
TMPRSS6  
VAV3  
TYROBP  
TRH  
TRHR  
TFE3  
TLL1  
SSTR1  
SPG7  
PLCE1  
SLC25A24  
SLC29A3  
SF3B4  
SI  
NARS2  
GPNMB  
COMMD1  
DLX3  
AP2S1  
LAMP1  
ICMT  
HPGDS  
KIF1A  
GNA15  
GNRH1  
DGKQ  
ERCC8  
CLDN16  
ACTC1  
ADH1A  
B4GALT7

BANF1  
CDH23  
TCOF1  
NAGLU  
USH1C  
TWIST2  
UBA7  
STX16  
SUMF1  
PLS3  
MOCOS  
MOCS2  
SLC31A1  
MTRR  
ROBO2  
NAGS  
ASAH2  
GSTZ1  
MGAM  
CNN1  
TKTL1  
SSTR5  
NPHS2  
ATOX1  
FCAR  
BSND  
AFF2  
INF2  
LEMD3  
GCM2  
DNAJB11  
CRTAP  
CAPZB  
ONECUT1  
SYNE1  
PNPLA3  
MOCS1  
PROP1  
NUP153  
SCLY  
SNX10  
SMPD3  
B3GALT6  
IRX5  
LDB1  
LRRK1  
GHRH  
CELSR3



CPNE3  
CPZ  
CYBRD1  
ALX1  
ALX4  
NBAS  
SYNE2  
TELO2  
PRDM5  
SEC24B  
PDLIM5  
PLEK  
PCDH15  
NIT2  
MTX1  
NAT10  
RAI1  
HEPH  
KHDRBS3  
LHX8  
GOLM1  
ASAP2  
ZNF23  
OSTM1  
TBX22  
VSX1  
SUN1  
NYX  
RCE1  
FEZ1  
HGSNAT  
DBP  
ERAP2  
DNAH8  
ENAM  
ZNF354A  
NBR1  
SUN2  
SPECC1L  
SOX8  
ST18  
FOXE3  
COL5A3  
KLC4  
IFT43  
KIAA0319L  
IGDCC3  
FAM111B

CFHR2  
ATP6V0E1  
ZSWIM6  
THSD4  
P3H2  
LIN54  
LOXHD1  
MBD6  
H2AX  
HJV  
FBN3  
EPDR1  
ZNF346  
ONECUT2  
VIT  
TTI2  
SSPN  
PPP1R12C  
NARS1  
FSCB  
CEP350  
IFITM5  
FKBP11  
ALX3  
PRPSAP2  
PDF  
ARSH  
LARP6  
F8A1  
ADAM18  
ZNF469  
TMEM222  
MT-CO1  
KIAA0895  
FAM102A  
WHRN  
OR2D2  
P3H4  
BSX  
BEX3  
TAAR9  
CMSS1  
RBM33  
CCDC154  
ZNF98  
PLPPR3  
DIRC1  
FRG2C

VCAN-AS1  
CA3-AS1  
MFF-DT  
CNC2  
LOC107652445  
LOC106627982  
LOC106146152  
LOC106050103  
LOC106146143  
LOC106146144  
LOC106146150  
LOC106146151  
BCL2L1  
C4BPA  
F2RL2  
CCN3  
TYK2  
ITGA2B  
MAP3K1  
STAT6  
ITGA5  
HPRT1  
ENTPD1  
CD9  
DKK2  
TNFRSF12A  
CD63  
ADAM8  
THPO  
SLC3A2  
CD84  
KERA  
CHRD  
OGN  
TSPAN4  
PRKCD  
PCNA  
YWHAE  
ABCA1  
CASP9  
MMP19  
ABCC4  
PRDX2  
ANGPTL4  
P2RX7  
TFDP1  
LAMA5  
E2F1

PRDX3  
SEMA3C  
MTDH  
USP3  
CCL27  
SNTB1  
GPX1  
TXNRD2  
CORIN  
SLC20A1  
SELENOP  
PDGFRB  
MAP2K1  
NTRK2  
FLT4  
G6PD  
GRB2  
IRS1  
HSPA8  
GFAP  
HSD3B2  
CCNB1  
PTGER3  
KLF4  
SCARB1  
COL18A1  
FGF5  
DLX5  
SEMA4A  
IL12B  
ID1  
ITGB7  
CMA1  
CITED2  
ELK1  
THBS4  
SKIL  
HSPA4  
NTF3  
MT2A  
HOXD9  
GRP  
MARCO  
AZU1  
RND1  
OMD  
C1QTNF3  
IFI27

A1BG  
CALCB  
VSIG4  
ITGBL1  
CPQ  
H2BC21  
SELENOS  
H3C14  
MIR194-1  
JAK1  
PIK3CD  
PTPN11  
HSPB1  
ABCB1  
CSNK2A1  
CYP3A4  
GRIN1  
PRKCH  
SLC9A1  
MYB  
RARB  
ITGA6  
KCNMA1  
TF  
STK11  
RRM2B  
EEF2  
ALDOA  
SLC2A3  
SCNN1B  
GDNF  
MAP3K3  
MAP3K11  
EPHB1  
ESRRA  
ADAM9  
CAMK2G  
CHAT  
CDH11  
EPHX1  
REN  
TTN  
TYRO3  
TFAP2A  
C1QA  
IRF8  
HMGA1  
GFPT1

DDX58  
EFNB1  
CD46  
CYBB  
ACLY  
BAP1  
DAG1  
VIPR1  
SUMO1  
MYCN  
PTPN2  
ITCH  
CCNA2  
AICDA  
TCF7L2  
THBS2  
SREBF1  
MMP15  
PTPRB  
KCNA2  
FZD10  
C1QB  
CD274  
GRK6  
HSF1  
IDO1  
ID2  
LAMA4  
FABP4  
CENPE  
C1QC  
AGRN  
USP14  
VIPR2  
TPH1  
PRF1  
NR2C2  
PTGDS  
SEMA4D  
RXFP1  
FSCN1  
GAB2  
B3GAT1  
INHA  
ITGA9  
MAP3K4  
HDAC10  
GRK5

GSTA4  
AGTR2  
CLOCK  
ACD  
CDH13  
EEF1A1  
DNASE1L3  
MDK  
TRAP1  
TIRAP  
SMAD1  
PLTP  
PLXNB1  
PRMT5  
PDGFA  
PDYN  
PHOX2B  
RAMP1  
TNFRSF14  
FOXO4  
GRPR  
ID3  
IFI16  
LILRB1  
LPIN2  
CDKN3  
CPA6  
DHRS3  
CDO1  
P2RX3  
TREX1  
TIE1  
TNFRSF10D  
TNFRSF18  
SETDB1  
PCM1  
KLF15  
IL15RA  
CSGALNACT2  
CAPZA1  
BATF  
ATG12  
PADI3  
G3BP1  
BCL3  
CCR9  
GNG5  
EDIL3

BHLHE41  
CHRD1  
TRIM2  
TERF2  
TRAIIP  
TAB3  
TEP1  
TPST1  
SULF2  
SLC9A2  
OXT  
RCOR1  
HPX  
IVNS1ABP  
DEFB1  
ADAM28  
BAIAP2L1  
TTF2  
TNFRSF10C  
TNFSF18  
MKKS  
FBLIM1  
C1D  
CD53  
CD5L  
TRIM38  
TINAGL1  
SRGN  
PDIA2  
IER3  
DEFA5  
IL17D  
UCN3  
TRIB1  
TRIB2  
PIWIL2  
PIWIL4  
NLRP6  
MYCL  
RASGRP4  
SAP30BP  
ADPRH  
HECTD2  
DEFA3  
DEFA6  
CLEC4E  
MKX  
PRTG



GCNT4  
EFS  
ZNF277  
PTPA  
PGPEP1  
IL26  
LBH  
ADM2  
CLEC5A  
ZNF302  
UCN2  
TTC38  
H3C1  
SFMBT2  
CNMD  
TERC  
RBIS  
PABIR2  
MIR143  
MIR124-1  
MIR142  
MIR19A  
MIR216A  
MIR19B1  
MIR1275  
MCM3AP-AS1  
MIR608  
MIR92A2  
MIR519B  
MIR382  
MIR558  
MIR602  
MIR203B  
CDR1-AS  
TALDO1P1  
LOC108021846  
CSNK1D  
PTPN1  
CSNK2B  
GNB3  
PLA2G6  
GZMB  
MMP11  
REST  
PAPSS1  
COPS5  
DDAH2  
GABPA

APOM  
LY6G5C  
FRA1H  
CALCRL  
MAP3K4-AS1  
FSHR  
IFNGR1  
CASP7  
RDX  
IDE  
MAPKAPK2  
TRPC6  
TPO  
FZD5  
MC2R  
HSP90AA1  
DLG4  
RBPJ  
TRPC3  
PIK3C2A  
MSN  
ITGA2  
KLK3  
ITGB6  
FGF10  
DCC  
OPRL1  
P2RY2  
SLC20A2  
ADORA2A  
HSPG2  
IGF2R  
HRH1  
EZR  
ITGAX  
HGS  
FGF14  
SMURF1  
SNCAIP  
LBP  
CBX3  
ENPP2  
FOSB  
CD70  
ITGA11  
FGF13  
CENPJ  
DDB1

MC5R  
FOSL2  
MIP  
TRPC5  
PTGDR2  
EPO  
BRD1  
CD276  
KCNN1  
RHOD  
SFRP5  
SERPINA7  
ITGA10  
MRPL17  
NOX5  
DPT  
ACKR1  
P4HTM  
NUPR1  
ABHD16A  
DEFB104A  
GPANK1  
C6orf47  
CGAS  
CIP2A  
DEFB104B  
HOTTIP  
LINC-PINT  
MIR770  
FADD  
KITLG  
IL21R  
CNTF  
ERRFI1  
MDM2  
A2M  
HNRNPA2B1  
IL36B  
ELP1  
MAP2K2  
KIT  
PLK1  
SQSTM1  
NR1H4  
NR1H2  
KRT18  
GNAI1  
CASP10

TXNRD1  
PNLIP  
PRKAB1  
PTGIS  
IRF3  
LIFR  
F13A1  
CDK1  
TBX5  
WEE1  
CRHR1  
EIF2S1  
SNAI2  
ALPI  
SERPINA6  
HNRNPD  
EHF  
DIO1  
GAST  
ADAMTS16  
LAIR2  
HEXD  
MIR126  
HAS2-AS1  
GRASLND  
EGFR  
ATR  
JAK3  
AXL  
CDK2  
NTRK3  
CDC42  
PGR  
IRAK1  
CYLD  
EGLN1  
EIF2AK3  
MEF2C  
VCP  
AXIN2  
PLD1  
ODC1  
RHEB  
IRAK4  
IL2RG  
MAPK13  
IFIH1  
GLI1

TLR7  
PIN1  
PRMT1  
PITX2  
PTGIR  
PTK2  
SDHA  
YWHAZ  
ATF4  
KDM6A  
CARM1  
GGCX  
CLTC  
NR4A1  
SMAD9  
PDE8B  
PDK4  
NEFH  
HELLS  
CISH  
EIF2AK2  
TGFB1  
RASGRP2  
MAP3K14  
IL10RB  
GP6  
CLEC7A  
AMD1  
CBFB  
EIF2AK4  
MDM4  
UGT2B7  
TNFSF15  
SRD5A1  
PLAA  
PPM1A  
PDE4B  
S1PR2  
CYSLTR1  
HSPA1A  
GAS6  
ABCB7  
AGRP  
ENPP3  
NPPB  
UGT1A9  
TRAF3IP2  
TRADD

RGS4  
PCSK7  
NTF4  
ROM1  
RGS10  
PTPRK  
AREG  
ANXA7  
H6PD  
BNIP3  
AIMP1  
DUSP5  
USP5  
TPR  
PYY  
SEMA7A  
RASGRF1  
IAPP  
LIPF  
HNRNPC  
BRD3  
HCRT  
HSPB2  
LMOD1  
GLRA3  
RGS5  
RGS7  
CD83  
ITGAE  
MAPRE3  
IFNA1  
IL1F10  
EBI3  
CTRL  
AP2A1  
UXS1  
SPAM1  
SLC16A4  
IRX1  
NELL1  
EBAG9  
UGT1A3  
TXNDC5  
TSPAN9  
CCL17  
MADCAM1  
CHST4  
TET1

PHOSPHO1  
PIEZO1  
COL20A1  
CASC3  
TNIP3  
TP53AIP1  
LILRA5  
ENGASE  
CNN3  
ARL15  
RNPC3  
PPARGC1B  
CD24  
HIVEP3  
RNASE7  
JPH4  
GCFC2  
CSN1S1  
VEGFD  
RASL11B  
CSRNP1  
CCN5  
ZBED3  
GDPD4  
ERV3-1  
NAA80  
TSBP1  
MIR192  
MIR499A  
MIRLET7A1  
MIR191  
MIR155HG  
SNHG7  
MIR181B1  
MIR302D  
MIR302B  
EPB41L4A-AS1  
MIR532  
MIR1276  
SAA3P  
UGT1A  
TRAP  
STQTL2  
DDH1
